1 **Perfluorooctane sulfonate affects**  
2 **proliferation and differentiation of**  
3 **pluripotent human teratocarcinoma cells**

4

5 **Mina Popovic<sup>1</sup>, Brett A. Neilan, Francesco Pomati<sup>2\*</sup>**

6 School of Biotechnology and Biomolecular Sciences, The University of New South  
7 Wales, 2052 Sydney, Australia

8

9

10 <sup>1</sup> Present address: Department of Reproductive Medicine, Ghent University Hospital De  
11 Pintelaan 185, Ghent, Belgium; <sup>2</sup> Present address: Eawag, Swiss Federal Institute of  
12 Aquatic Science and Technology, Department of Aquatic Ecology, Überlandstrasse 133,  
13 8600 Dübendorf, Switzerland

14 \* Correspondence to: F. Pomati, e-mail: [francesco.pomati@eawag.ch](mailto:francesco.pomati@eawag.ch)

15

16 **ABSTRACT** Perfluorinated compounds have raised concern due to their potential  
17 association with detrimental postnatal outcomes in animals and humans. We tested the effects  
18 of perfluorooctane sulfonate (PFOS) on a human pluripotent teratocarcinoma (known as  
19 NCCIT) cells as an *in vitro* prototype for developmental toxicity in mammals. NCCIT  
20 contains stem-cells able to differentiate into endoderm, mesoderm and ectoderm. We tested  
21 our cell model using a teratogenic compound, retinoic acid (RA), a cytotoxin, nocodazole  
22 (ND), and PFOS. We assayed cells proliferation, morphology and expression of stem cell and  
23 germ layer marker genes. PFOS reduced NCCIT cell proliferation in a concentration-  
24 dependent manner and induced morphological changes in cell cultures that resembled  
25 ectodermal phenotypes. A tendency towards a differentiated state in NCCIT was confirmed  
26 by real-time gene expression. PFOS triggered up-regulation of the gene nestin, indicative of  
27 ectodermal lineage differentiation, and interfered with the expression of the pluripotency  
28 stem-cell marker TERT. PFOS produced effects on both cells proliferation and differentiation,  
29 although not as severe as those observed for RA and ND, at levels that fall within the range of  
30 concentrations found in animal and human plasma. We discuss our findings in the context of  
31 possible interference of PFOS with the processes governing the early development of  
32 mammalian tissues.

33

34 **Keywords** human stem-cells, PFOS, developmental toxicity, pluripotency, NCCIT,  
35 teratocarcinoma, germ-cell marker genes.

## 36 INTRODUCTION

37

38 The ubiquitous presence in the environment of perfluorinated surfactant compounds  
39 such as perfluorooctanesulfonic acid (PFOS) and perfluorooctanoic acid (PFOA) has resulted  
40 in considerable concern (Giesy and Kannan 2001; Houde et al. 2008; Jensen and Leffers  
41 2008; Loos et al. 2007). Animal studies have indicated that PFOS and PFOA have the  
42 potential for developmental toxicity (Austin et al. 2003; Beach et al. 2006; Berger et al. 2009;  
43 Bjork et al. 2008; Giesy and Kannan 2001; Kennedy et al. 2004; Lau et al. 2004; Loveless et  
44 al. 2006). Human studies have presented epidemiological evidence linking birth defects and  
45 thyroid disease to blood serum PFOS and PFOA concentrations in the range of  $\mu\text{g/L}$   
46 (Apelberg et al. 2007a; Apelberg et al. 2007b; Jensen and Leffers 2008; Melzer et al. 2010).

47 In this study we investigated the effects of PFOS at exposure levels relevant to animal  
48 and human sera using a stem cell-based test. Embryonic stem (ES) cells have proven to be a  
49 promising model to study developmental toxicity of chemicals (Whitlow et al. 2007). The use  
50 of ES cells, however, presents a number of challenges (see Supplementary Online Material).  
51 To avoid issues associated with the use of ES cells, we chose a human germ-cell line derived  
52 from a teratocarcinoma known as NCCIT (National Cancer Centre Immature Teratoma),  
53 which is analogue to a pluripotent ES line (Damjanov et al. 1993; Rohwedel et al. 2001;  
54 Teshima et al. 1988). Teratocarcinomas contain both undifferentiated stem- and differentiated  
55 cells that can commit to endoderm, mesoderm and ectoderm. NCCIT cells express markers of  
56 germ layers like ES cells, are capable of continuous renewal in minimal media like cancer  
57 cells (without the need of a feeder layer of primary cells) but do not show up-regulation or  
58 induction of typical tumour gene markers (Damjanov et al. 1993; Sperger et al. 2003;  
59 Taranger et al. 2005). Pluripotency in NCCIT has been proven by the expression of  
60 undifferentiated hES cells markers, including the telomerase reverse transcriptase gene

61 (TERT) (Sperger et al. 2003; Taranger et al. 2005). Here, we aimed at using NCCIT as a stem  
62 cell model to test the effects of PFOS compared to known teratogenic and cytotoxic  
63 compounds such as retinoic acid (RA) and nocodazole (ND). We found that PFOS was able to  
64 interfere with the growth and differentiation processes of NCCIT cells.

65

## 66 **MATERIALS AND METHODS**

### 67 *Chemicals*

68 Standard solutions were purchased from Sigma (Sigma-Aldrich, Dorset, UK). Experimental  
69 concentrations of PFOS were selected based on previously reported levels in human plasma  
70 (for details see (Apelberg et al. 2007a; Apelberg et al. 2007b; Melzer et al. 2010)). Each  
71 chemical was suspended in ethanol and stored at -20°C. RA was suspended in ethanol  
72 immediately prior to experimental testing, due to its high sensitivity to UV light and oxidizing  
73 agents.

74

### 75 *Cell cultures and toxicity assays*

76 The NCCIT cell line was obtained from American Type Culture Collection (ATCC,  
77 Manassas, VA; Catalog No. CRL-2073). NCCIT cells were cultured in Dulbecco's modified  
78 eagle medium (DMEM) (Lonza BioWhittaker, Basel, Switzerland), containing 2 mM  
79 glutamine, 4.5 g/L glucose, 10% fetal bovine serum (FBS) (Gibco-Invitrogen Corporation,  
80 Carlsbad, CA, USA), and maintained at 37°C with 5% CO<sub>2</sub> in a humidified atmosphere. This  
81 work was performed using NCCIT cultures at 60% confluence.

82 Prior to testing, stock solutions of chemicals were diluted in DMEM (0% FBS) to  
83 obtain the maximum exposure concentration of 1 mg/L. One in three dilutions were  
84 performed in DMEM (0% FBS) to obtain 11 dilutions for each chemical ranging from 1000 to  
85 0.017 µg/L (comprising environmentally relevant exposure levels). Test dilutions of

86 chemicals were added to three  $\times 10^3$  cells seeded across 96-well plates (final volume 100  $\mu$ L  
87 DMEM 5% FBS per well). Five untreated controls and five replicates for each concentration  
88 were prepared for each 96-well plate in each experiment and incubated for 48 h at 37°C, 5%  
89 CO<sub>2</sub>. Microtitre tests were performed using the CellTitre-96 AQueous One Solution Cell  
90 Proliferation Assay kit (Promega Corporation, Madison, WI). Absorbances were recorded  
91 using a microplate-reader at 490 nm (optical density - OD of the dye) and 650 nm (OD for  
92 background reference). To document cell morphology, 250  $\times 10^3$  cells were seeded in 6-well  
93 plates including duplicated IC<sub>10</sub> and IC<sub>50</sub> concentration treatments together with untreated  
94 controls (final volume 3 mL DMEM 5% FBS), incubated for 48 h at 37°C, 5% CO<sub>2</sub>. Cells  
95 were then stained with trypan-blue, enumerated and microscopically photographed. More  
96 details on standard procedure for harvesting, stocking of cells, proliferation and  
97 morphological assays are provided in Supplementary Online Material.

98

#### 99 *Effective concentration analysis*

100 Proliferation data, expressed as percentage of MTS absorbance final values in treated cells  
101 over untreated-controls, were analysed using PriProbit (PriProbitNM, 1998-2000 Masayuki  
102 Sakuma). Concentrations resulting in 10% and 50% inhibition of proliferation (IC<sub>10</sub> and IC<sub>50</sub>)  
103 were derived from a log-logistic symmetric fit of the concentration-effect curves, with the  
104 quality of fit to the mathematical model evaluated as an Akaike's Information Criterion.

105

#### 106 *RNA extraction and real-time PCR assays*

107 Cells were seeded in 6-well plates (250  $\times 10^3$  cells per well) including duplicated untreated  
108 controls and duplicated IC<sub>10</sub> and IC<sub>50</sub> treatments with RA, ND and PFOS. Total RNA was  
109 extracted from cells 48 h after exposure to test chemicals using TRI-Reagent LS following the  
110 manufacturer's protocol (Sigma). RNA was resuspended in RNase-free water (Invitrogen)

111 pooling experimental duplicates for each treatment, and 1 µg of total RNA was retro-  
112 transcribed (cDNA synthesis, Marligen Biosciences, Rockville, MD, USA) using random  
113 nonamers and oligo-dT primers. Reverse transcription was performed in 3 replicates as  
114 follows: 22°C for 5 min, 42°C for 90 min and 85°C for 5 min.

115 Quantitative PCR targeted nestin (ectoderm), brachyury (mesoderm), alpha-fetoprotein  
116 (AFP, endoderm), and TERT (maintenance of pluripotency). Glyceraldehydes 3-phosphate  
117 dehydrogenase (GAPDH) and β-actin were chosen as housekeeping genes (see  
118 Supplementary Online Material, Table S1). Analyses were performed using QuantiTect  
119 Primer Assays and QuantiTect SYBR-Green PCR Master-Mix (Qiagen, Doncaster,  
120 Australia), optimised for efficiency by the producing company. One hundred-fold diluted  
121 cDNA samples were added to the real-time PCR reaction mix (final reaction volume of 25  
122 µL) in three replicates for each cDNA sample. Two-step cycling was performed using the  
123 Rotor-Gene 3000A system (Corbett/Qiagen): 50°C hold for 2 min, 95°C for 2 min, 40 cycles  
124 at 95°C for 15 s and 60°C for 30 s. Expression levels and statistics for each transcript,  
125 normalised to housekeeping genes and relative to untreated cells, were obtained by  
126 comparative delta-delta-Ct method using the Relative Expression Software Tool (REST<sup>®</sup>)  
127 (Pfaffl et al. 2002). More details on real-time PCR protocols are reported in Supplementary  
128 Online Material.

129

## 130 **RESULTS AND DISCUSSION**

### 131 *Cell proliferation*

132 RA, ND and PFOS were able to reduced NCCIT cell proliferation in a concentration-  
133 dependent manner (Fig 1). Relative to untreated cultures and after 48 h exposure, ND more  
134 strongly inhibited NCCIT proliferation compared to either PFOS or RA. IC<sub>10</sub> and IC<sub>50</sub> values

135 derived for RA, ND and PFOS are summarised in Table 1. PFOS showed a lower  $IC_{50}$  than  
136 RA. Viability of cells was assayed by trypan-blue staining for RA, ND and PFOS treated  
137 cultures (data not shown), supporting the cytotoxicity assay results and suggesting induction  
138 of cell death as mechanism of reduced cells proliferation. The  $IC_{10}$  value derived for PFOS  
139 based on NCCIT cells proliferation tests falls within the range of concentrations previously  
140 reported in animal and human blood sera (Apelberg et al. 2007a; Apelberg et al. 2007b;  
141 Melzer et al. 2010). Serum collected from pregnant women and umbilical cords have been  
142 shown to contain 16.2  $\mu\text{g/L}$  of PFOS (Monroy et al. 2008), while concentrations of 12.8  $\mu\text{g/L}$   
143 were obtained from general human blood serum samples (Olsen et al. 2003).

144

#### 145 *Cell differentiation*

146  $IC_{10}$  and  $IC_{50}$  levels were used to assess morphological changes in NCCIT cells following  
147 treatment with RA, ND and PFOS. Cells treated with the chemicals formed smaller and flatter  
148 colonies compared to controls (Fig. 2A, Supplementary Fig. S2-S4), with multi-nucleated and  
149 more differentiated branching cells characterised by elongated cytoplasmic processes. In the  
150  $IC_{50}$  treatments a number of detached small rounded (apoptotic) cells were evident  
151 (Supplementary Fig. S2-S4), with ND showing the strongest effects (Supplementary Fig. S3).  
152 Flattened colonies and differentiating cells with branching processes were visible in both  $IC_{10}$   
153 and  $IC_{50}$  treatments for all chemicals (Fig. 2 B-C-D). In particular, PFOS induced changes in  
154 NCCIT cell morphology that were indicative of both differentiation and cytotoxic effects (Fig.  
155 2D, Supplementary Fig. S4).  $IC_{10}$  exposure levels resulted in smaller and flattened colonies  
156 with differentiated cells and  $IC_{50}$  doses induced apoptosis in NCCIT, with surviving cells  
157 expressing extended cytoplasmic processes (Fig. 2D).

158           The inner mass of a NCCIT cells colony represents the equivalent of pluripotent stem  
159 cells, which normally differentiate into epithelial-like (more flattened) cells at the edges of  
160 colonies (Damjanov et al. 1993; Teshima et al. 1988). IC<sub>10</sub> and IC<sub>50</sub> treated cultures showed  
161 epithelial-cell features (Fig. 2-3-4 B-D) indicating a possible differentiation of NCCIT into  
162 the ectodermal germ-layer (Damjanov et al. 1993). These morphological observations were  
163 verified by the expression pluripotency / differentiation gene markers.

164           Exposure of NCCIT cells to RA resulted in a 8.6-fold and 2.7-fold up-regulation of  
165 TERT (pluripotency), and a 10.9-fold and 33.45-fold up-regulation of nestin (ectoderm) in the  
166 IC<sub>10</sub> and IC<sub>50</sub> exposures, respectively, compared to controls and relative to housekeeping  
167 genes (Fig. 3). Weaker effects on gene expression were observed for the ND treatments, in  
168 which TERT showed a 4.6-fold and 2-fold increased expression and nestin a 1.7-fold and 9-  
169 fold increase in transcript accumulation for the IC<sub>10</sub> and IC<sub>50</sub> exposure levels, respectively  
170 (Fig. 3). PFOS was the strongest inducer of TERT mRNA expression in NCCIT, with a 62.6-  
171 fold and 11-fold up-regulation of the pluripotency marker for IC<sub>10</sub> and IC<sub>50</sub> exposure levels,  
172 respectively (Fig. 3). PFOS had an effect on nestin expression in NCCIT cells similar to the  
173 one exerted by ND, with 1.5-fold and 6-fold up-regulation for IC<sub>10</sub> and IC<sub>50</sub> exposure levels,  
174 respectively (Fig. 3).

175           TERT and nestin were significantly up-regulated across all levels of chemical  
176 exposure compared to the controls and relative to housekeeping genes (Fig. 3). IC<sub>50</sub> doses,  
177 however, consistently resulted in reduced TERT and increased nestin genes expression  
178 compared to IC<sub>10</sub> treatments (Fig. 3). Increased transcription of TERT in response to IC<sub>10</sub>  
179 doses can be attributed to other functions of TERT beyond its major role in telomere  
180 maintenance (Karlseder et al. 2004) and may highlight an early response to cytotoxic effects.  
181 TERT expression in response to cytotoxic stress can enhance cell survival with an anti-  
182 apoptotic role (Cao et al. 2002; de Lange 2005). The subsequent decrease in TERT expression



183 at increasing doses is consistent with loss in pluripotency and commitment of stem-cells to a  
184 particular lineage after exposure to teratogenic and toxic chemicals (Adler et al. 2008;  
185 Rohwedel et al. 2001). The hypothesis that NCCIT cells attempted to cope with chemical  
186 stress at low doses and then differentiate at higher exposure levels was confirmed by the  
187 detected patterns in nestin expression. An increase compared to control levels was observed at  
188  $IC_{10}$  and  $IC_{50}$  for all test compounds (Fig. 3). Our results indicated that exposure of NCCIT  
189 cells to PFOS induced specialisation into ectodermal lineages.

190

## 191 *Conclusions*

192 Our data suggest that the environmental pollutant PFOS can interfere with the  
193 functioning and differentiation processes of developing tissues *in vitro*. Given the mixed  
194 population in NCCIT, comprising both differentiated and undifferentiated cells, the tendency  
195 towards an increase in ectodermal cells after exposure to the tested chemicals may have been  
196 the result of two processes: a commitment of stem cells to ectodermal lineages or a preferential  
197 selection of ectodermal cells among the population based on higher resistance towards toxins.  
198 The overall effects of PFOS were comparable to those observed for known teratogenic and  
199 cytotoxic compounds like RA and ND, at exposure levels that are relevant for risk  
200 assessment.

201 Giesy and Kannan (2001) have reported the global distribution of PFOS with  
202 measured concentrations in the environment and animal tissues that can exceed the  $IC_{10}$  levels  
203 derived here, although free concentration of PFOS in our *in vitro* assay (5% FBS) were  
204 probably higher than in animal sera where PFOS can bind to proteins (Jones et al. 2003).  
205 Future work should further investigate the mechanism by which PFOS can induce adverse  
206 effects on developing tissues *in vitro* and *in vivo*, considering both selection processes based  
207 on cells sensitivity in a mixed population and induction of cells differentiation. In this study,

208 we did not detect NCCIT multi-lineage differentiation based on the expression brachyury  
209 (mesodermal marker) and AFP (endodermal marker) (data not shown). The NCCIT cell-based  
210 test presented here, however, which is accessible to any tissue-culture laboratory and can be  
211 readily standardised, can be extended by the inclusion of ectoderm expression markers and  
212 may contribute in the future to screening of pollutants for potential developmental endpoints  
213 (for more details see Supplementary online Material).

214

## 215 **ACKNOWLEDGEMENTS**

216

217 The authors would like to thank Jason Woodhouse and Helder Marcel for technical support.

218

## 219 **REFERENCES**

220 Adler S, Pellizzer C, Hareng L, Hartung T, Bremer S. 2008. First steps in establishing a  
221 developmental toxicity test method based on human embryonic stem cells. *Toxicol In*  
222 *Vitro* 22(1):200-11.

223 Apelberg BJ, Goldman LR, Calafat AM, Herbstman JB, Kuklennyik Z, Heidler J, Needham  
224 LL, Halden RU, Witter FR. 2007a. Determinants of fetal exposure to polyfluoroalkyl  
225 compounds in Baltimore, Maryland. *Environ Sci Technol* 41(11):3891-7.

226 Apelberg BJ, Witter FR, Herbstman JB, Calafat AM, Halden RU, Needham LL, Goldman  
227 LR. 2007b. Cord serum concentrations of perfluorooctane sulfonate (PFOS) and  
228 perfluorooctanoate (PFOA) in relation to weight and size at birth. *Environ Health*  
229 *Perspect* 115(11):1670-6.

- 230 Austin ME, Kasturi BS, Barber M, Kannan K, MohanKumar PS, MohanKumar SM. 2003.  
231 Neuroendocrine effects of perfluorooctane sulfonate in rats. *Environ Health Perspect*  
232 111(12):1485-9.
- 233 Beach SA, Newsted JL, Coady K, Giesy JP. 2006. Ecotoxicological evaluation of  
234 perfluorooctanesulfonate (PFOS). *Rev Environ Contam Toxicol* 186:133-74.
- 235 Berger U, Glynn A, Holmstrom KE, Berglund M, Ankarberg EH, Tornkvist A. 2009. Fish  
236 consumption as a source of human exposure to perfluorinated alkyl substances in  
237 Sweden - analysis of edible fish from Lake Vattern and the Baltic Sea. *Chemosphere*  
238 76(6):799-804.
- 239 Bjork JA, Lau C, Chang SC, Butenhoff JL, Wallace KB. 2008. Perfluorooctane sulfonate-  
240 induced changes in fetal rat liver gene expression. *Toxicology* 251(1-3):8-20.
- 241 Cao Y, Li H, Deb S, Liu JP. 2002. TERT regulates cell survival independent of telomerase  
242 enzymatic activity. *Oncogene* 21(20):3130-8.
- 243 Damjanov I, Horvat B, Gibas Z. 1993. Retinoic acid-induced differentiation of the  
244 developmentally pluripotent human germ cell tumor-derived cell line, NCCIT. *Lab*  
245 *Invest* 68(2):220-32.
- 246 de Lange T. 2005. Shelterin: the protein complex that shapes and safeguards human  
247 telomeres. *Genes Dev* 19(18):2100-10.
- 248 Giesy JP, Kannan K. 2001. Global distribution of perfluorooctane sulfonate in wildlife.  
249 *Environ Sci Technol* 35(7):1339-42.

- 250 Houde M, Czub G, Small JM, Backus S, Wang X, Alae M, Muir DC. 2008. Fractionation  
251 and bioaccumulation of perfluorooctane sulfonate (PFOS) isomers in a Lake Ontario  
252 food web. *Environ Sci Technol* 42(24):9397-403.
- 253 Jensen AA, Leffers H. 2008. Emerging endocrine disruptors: perfluoroalkylated substances.  
254 *Int J Androl* 31(2):161-9.
- 255 Jones PD, Hu W, De Coen W, Newsted JL, Giesy JP. 2003. Binding of perfluorinated fatty  
256 acids to serum proteins. *Environmental Toxicology and Chemistry* 22(11):2639-2649.
- 257 Karlseder J, Hoke K, Mirzoeva OK, Bakkenist C, Kastan MB, Petrini JH, de Lange T. 2004.  
258 The telomeric protein TRF2 binds the ATM kinase and can inhibit the ATM-  
259 dependent DNA damage response. *PLoS Biol* 2(8):E240.
- 260 Kennedy GL, Jr., Butenhoff JL, Olsen GW, O'Connor JC, Seacat AM, Perkins RG, Biegel  
261 LB, Murphy SR, Farrar DG. 2004. The toxicology of perfluorooctanoate. *Crit Rev*  
262 *Toxicol* 34(4):351-84.
- 263 Lau C, Butenhoff JL, Rogers JM. 2004. The developmental toxicity of perfluoroalkyl acids  
264 and their derivatives. *Toxicol Appl Pharmacol* 198(2):231-41.
- 265 Loos R, Wollgast J, Huber T, Hanke G. 2007. Polar herbicides, pharmaceutical products,  
266 perfluorooctanesulfonate (PFOS), perfluorooctanoate (PFOA), and nonylphenol and  
267 its carboxylates and ethoxylates in surface and tap waters around Lake Maggiore in  
268 Northern Italy. *Anal Bioanal Chem* 387(4):1469-78.
- 269 Loveless SE, Finlay C, Everds NE, Frame SR, Gillies PJ, O'Connor JC, Powley CR, Kennedy  
270 GL. 2006. Comparative responses of rats and mice exposed to linear/branched, linear,  
271 or branched ammonium perfluorooctanoate (APFO). *Toxicology* 220(2-3):203-17.

- 272 Melzer D, Rice N, Depledge MH, Henley WE, Galloway TS. 2010. Association between  
273 serum perfluorooctanoic acid (PFOA) and thyroid disease in the U.S. National Health  
274 and Nutrition Examination Survey. *Environ Health Perspect* 118(5):686-92.
- 275 Monroy R, Morrison K, Teo K, Atkinson S, Kubwabo C, Stewart B, Foster WG. 2008. Serum  
276 levels of perfluoroalkyl compounds in human maternal and umbilical cord blood  
277 samples. *Environ Res* 108(1):56-62.
- 278 Olsen GW, Church TR, Miller JP, Burris JM, Hansen KJ, Lundberg JK, Armitage JB, Herron  
279 RM, Medhdizadehkashi Z, Nobiletti JB and others. 2003. Perfluorooctanesulfonate  
280 and other fluorochemicals in the serum of American Red Cross adult blood donors.  
281 *Environ Health Perspect* 111(16):1892-901.
- 282 Pfaffl MW, Horgan GW, Dempfle L. 2002. Relative expression software tool (REST) for  
283 group-wise comparison and statistical analysis of relative expression results in real-  
284 time PCR. *Nucleic acids research* 30(9).
- 285 Rohwedel J, Guan K, Hegert C, Wobus AM. 2001. Embryonic stem cells as an in vitro model  
286 for mutagenicity, cytotoxicity and embryotoxicity studies: present state and future  
287 prospects. *Toxicol In Vitro* 15(6):741-53.
- 288 Sperger JM, Chen X, Draper JS, Antosiewicz JE, Chon CH, Jones SB, Brooks JD, Andrews  
289 PW, Brown PO, Thomson JA. 2003. Gene expression patterns in human embryonic  
290 stem cells and human pluripotent germ cell tumors. *Proc Natl Acad Sci U S A*  
291 100(23):13350-5.
- 292 Taranger CK, Noer A, Sorensen AL, Hakelien AM, Boquest AC, Collas P. 2005. Induction of  
293 dedifferentiation, genomewide transcriptional programming, and epigenetic

294 reprogramming by extracts of carcinoma and embryonic stem cells. *Mol Biol Cell*  
295 16(12):5719-35.

296 Teshima S, Shimosato Y, Hirohashi S, Tome Y, Hayashi I, Kanazawa H, Kakizoe T. 1988.  
297 Four new human germ cell tumor cell lines. *Lab Invest* 59(3):328-36.

298 Whitlow S, Burgin H, Clemann N. 2007. The embryonic stem cell test for the early selection  
299 of pharmaceutical compounds. *ALTEX* 24(1):3-7.

300

301

## 302 **FIGURE LEGENDS**

303

304 **Fig. 1.** Dose-response curves for the test chemicals on the proliferation of NCCIT cells  
305 expressed as percentage of effect over control (untreated) cultures. Boxplots represent the  
306 range of experimental data-points (n=10), grey dashed lines the derived response models (see  
307 Methods). Panels depict effects of RA (A), ND (B) and PFOS (C).

308 **Fig. 2.** Appearance of NCCIT cells treated with the test chemicals, colour of image differs for  
309 optimal contrast. (A) Control (untreated cultures): cell colonies showing a biphasic  
310 morphology with surface cells appearing tall, predominately columnar in shape (indicated by  
311 black arrows), whereas inner core cells are mostly rounded and closely packed (indicated by  
312 white arrows). (B) IC<sub>50</sub> treatment with RA: close-up of cells with long cytoplasmic processes  
313 (black arrows). (C) Close-up of IC<sub>50</sub> treatment with ND: cells exhibiting elongated structures  
314 (black arrows). (D) Close-up of IC<sub>50</sub> treatment with PFOS: cells with cytoplasmic processes  
315 (black arrows).

316 **Fig. 3.** Expression profiles of TERT and nestin genes in NCCIT cells exposed to IC<sub>10</sub> and  
317 IC<sub>50</sub> levels of RA, ND and PFOS. Data are expressed as fold-change over the internal  
318 calibrator genes (GADPH and  $\beta$ -actin) and relative to control (untreated) cells. Bars on the  
319 graph correspond to the standard error of the mean (n=6). Statistical significance is reported at  
320  $p < 0.05$  with respect to control expression levels (\*).

321

**Table 1. IC values ( $\mu\text{g/L} \pm$  standard error) obtained with the NCCIT proliferation assay (48 h) for test chemicals (see Fig. 1).**

| <b>Chemical</b> | <b>IC<sub>10</sub></b> | <b>IC<sub>50</sub></b> |
|-----------------|------------------------|------------------------|
| <b>RA</b>       | 0.07 $\pm$ 0.006       | 578.8 $\pm$ 43.4       |
| <b>ND</b>       | 0.29 $\pm$ 0.06        | 86.6 $\pm$ 28.5        |
| <b>PFOS</b>     | 1.91 $\pm$ 0.21        | 201.7 $\pm$ 28.2       |



Figure 1

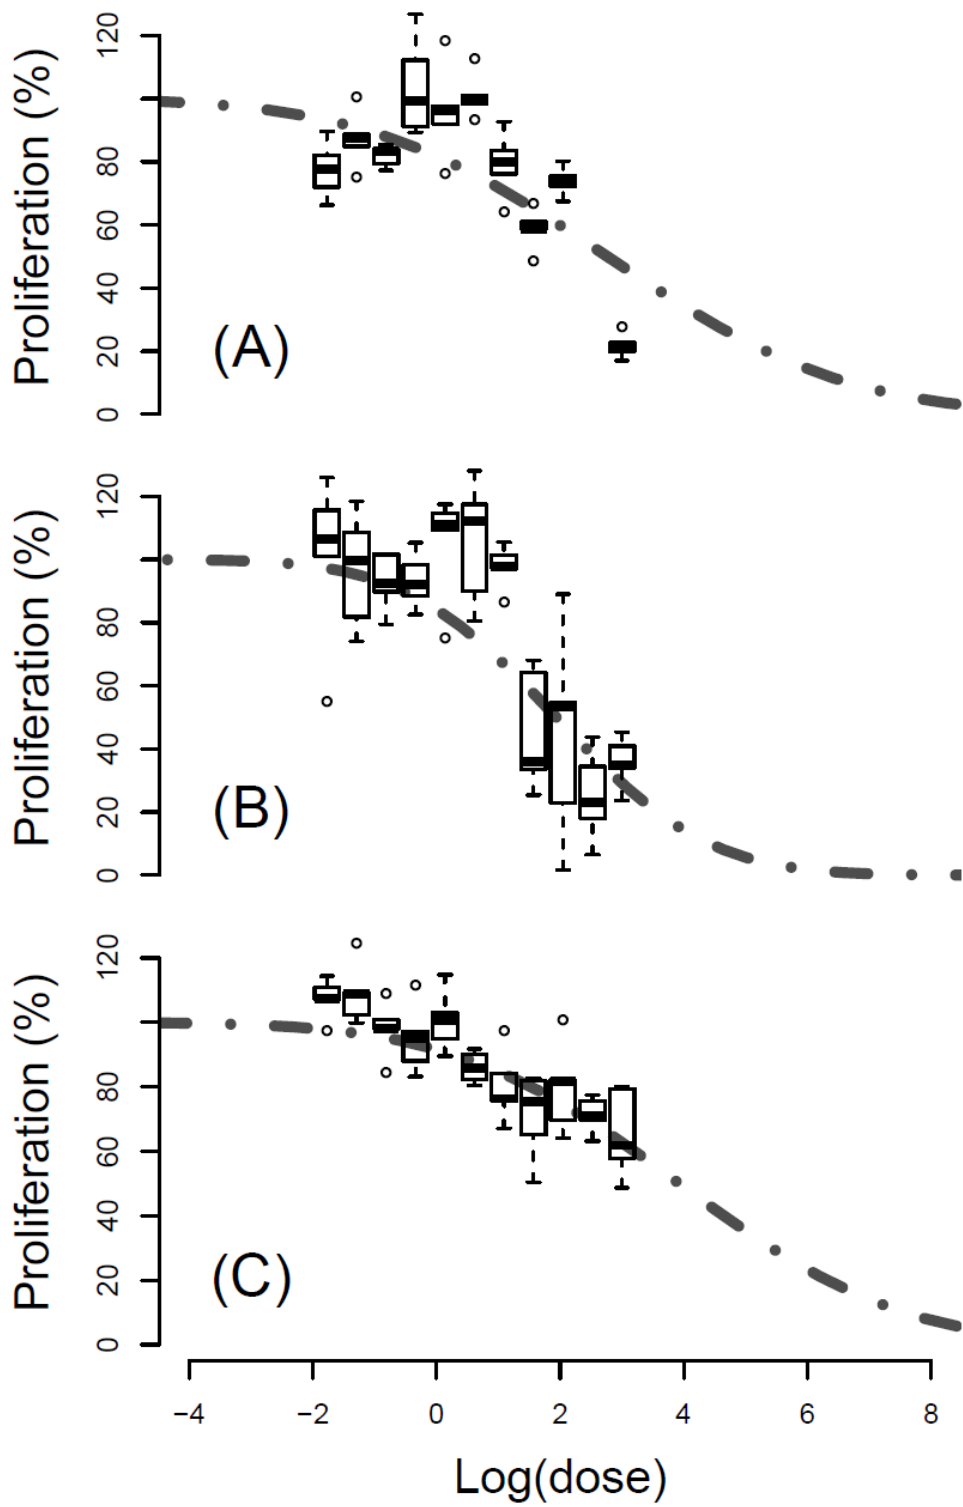

Figure 2

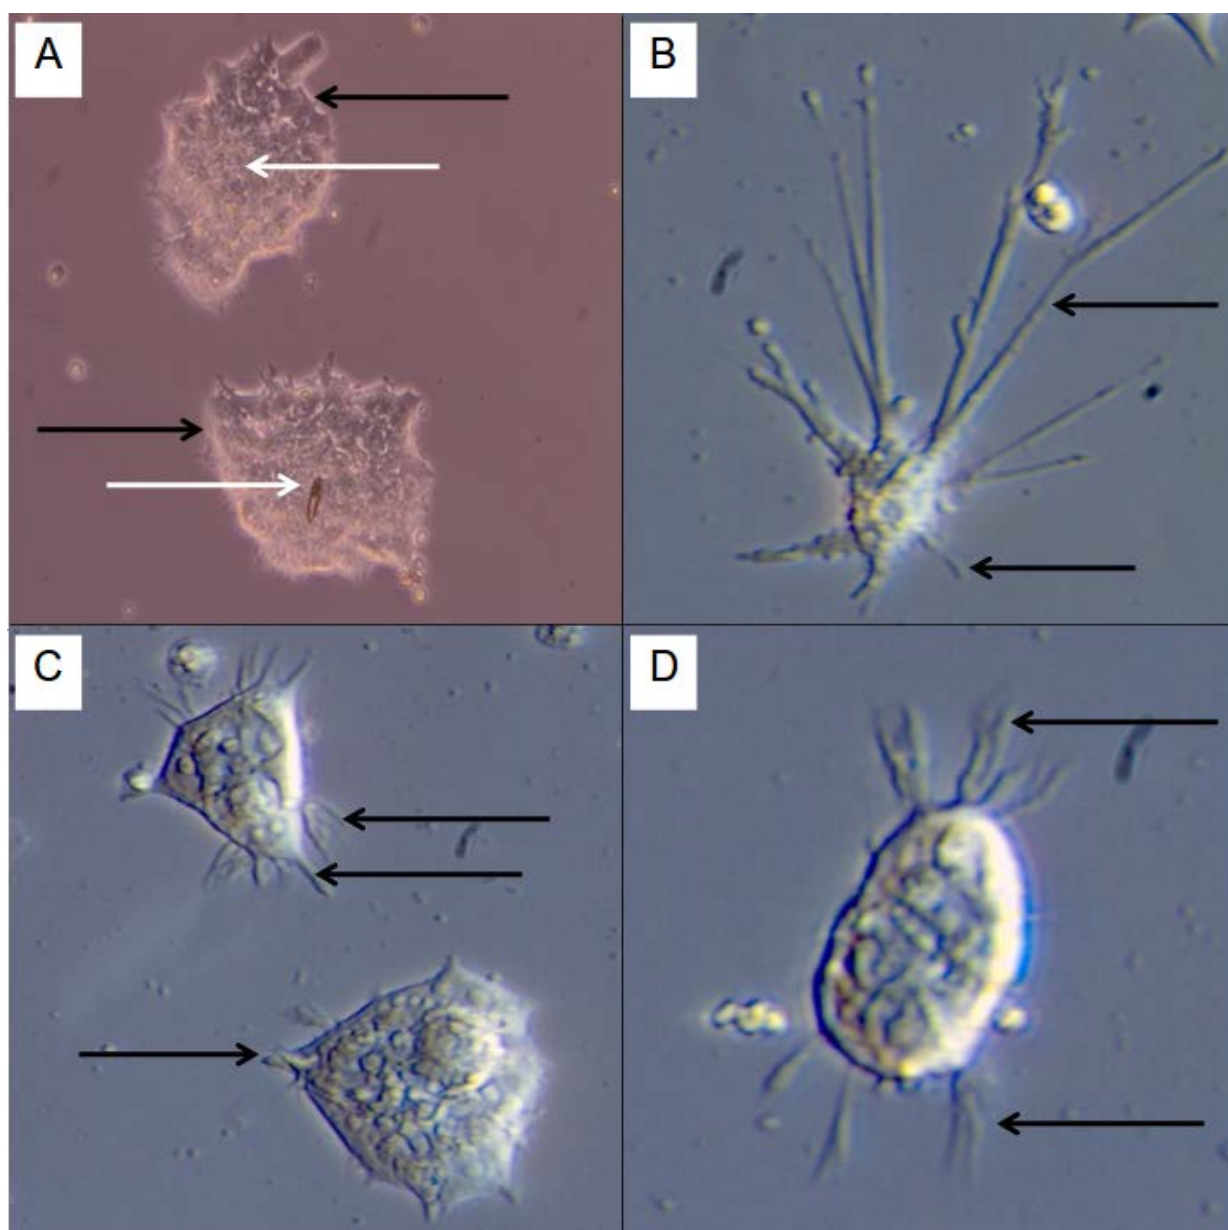

Figure 3

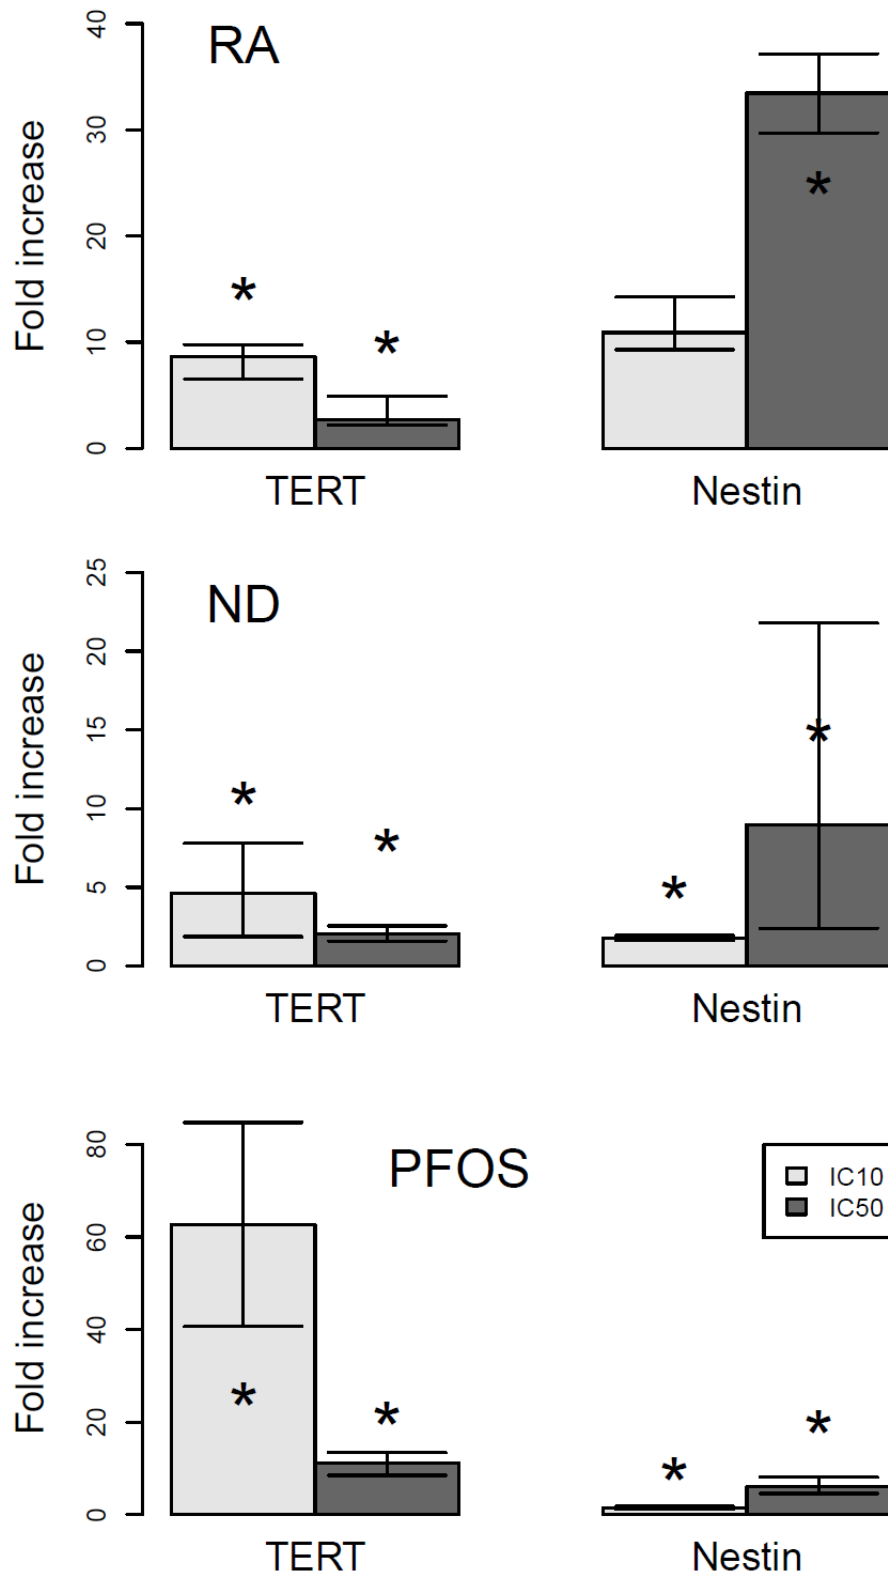

Source: http://www.biorxiv.org/content/10.1101/089698v1.full.pdf
